# Supplementary material for: The advent of multilayer antimonene nanoribbons with room temperature orange light emission
Source: Royal Society of Chemistry journal article supplement (doi:10.1039/c6cc02778d), 2016-01-01
Supplement: c6cc02778d1.pdf [file c6cc02778d1.pdf]

## Supplementary Information

# The Advent of Multilayer Antimonene Nanoribbons with Room Temperature Orange Light Emission

Hsu-Sheng Tsai<sup>1\*</sup>, Chia-Wei Chen<sup>2</sup>, Ching-Hung Hsiao<sup>2</sup>, Hao Ouyang<sup>2</sup>, Jenq-Horng Liang<sup>1,3\*</sup>

<sup>1</sup> Institute of Nuclear Engineering and Science, National Tsing Hua University, Hsinchu 30013, Taiwan, R.O.C.

<sup>2</sup> Department of Material Science and Engineering, National Tsing Hua University, Hsinchu 30013, Taiwan, R.O.C.

<sup>3</sup> Department of Engineering and System Science, National Tsing Hua University, Hsinchu 30013, Taiwan, R.O.C.

\*Correspondence to: b91520016@yahoo.com.tw and jhliang@ess.nthu.edu.tw

### Calculations

In Fig. S1a, the length of the dashed line, which contains a double reciprocal vector, is equal to  $8.09 \text{ nm}^{-1}$ , so that the length of the reciprocal vector is  $4.045 \text{ nm}^{-1}$ . The inverse of  $4.045 \text{ nm}^{-1}$  is equal to  $0.247 \text{ nm}$  that corresponds to the (211) interplanar distance ( $0.225 \text{ nm}$ ) of multilayer antimonene. On the other hand, the length ( $13.6 \text{ nm}^{-1}$ ) of the dashed line as shown in Fig. S1b contains a quadruple reciprocal vector. Hence, the length of the reciprocal vector is  $3.4 \text{ nm}^{-1}$ . The inverse of  $3.4 \text{ nm}^{-1}$  is equal to  $0.294 \text{ nm}$  that corresponds to the (110) interplanar distance ( $0.311 \text{ nm}$ ) of multilayer antimonene. These calculations, which derived from the experimental results, are in agreement with the theory and the error rate is less than 9%, indicating that the results are believable.

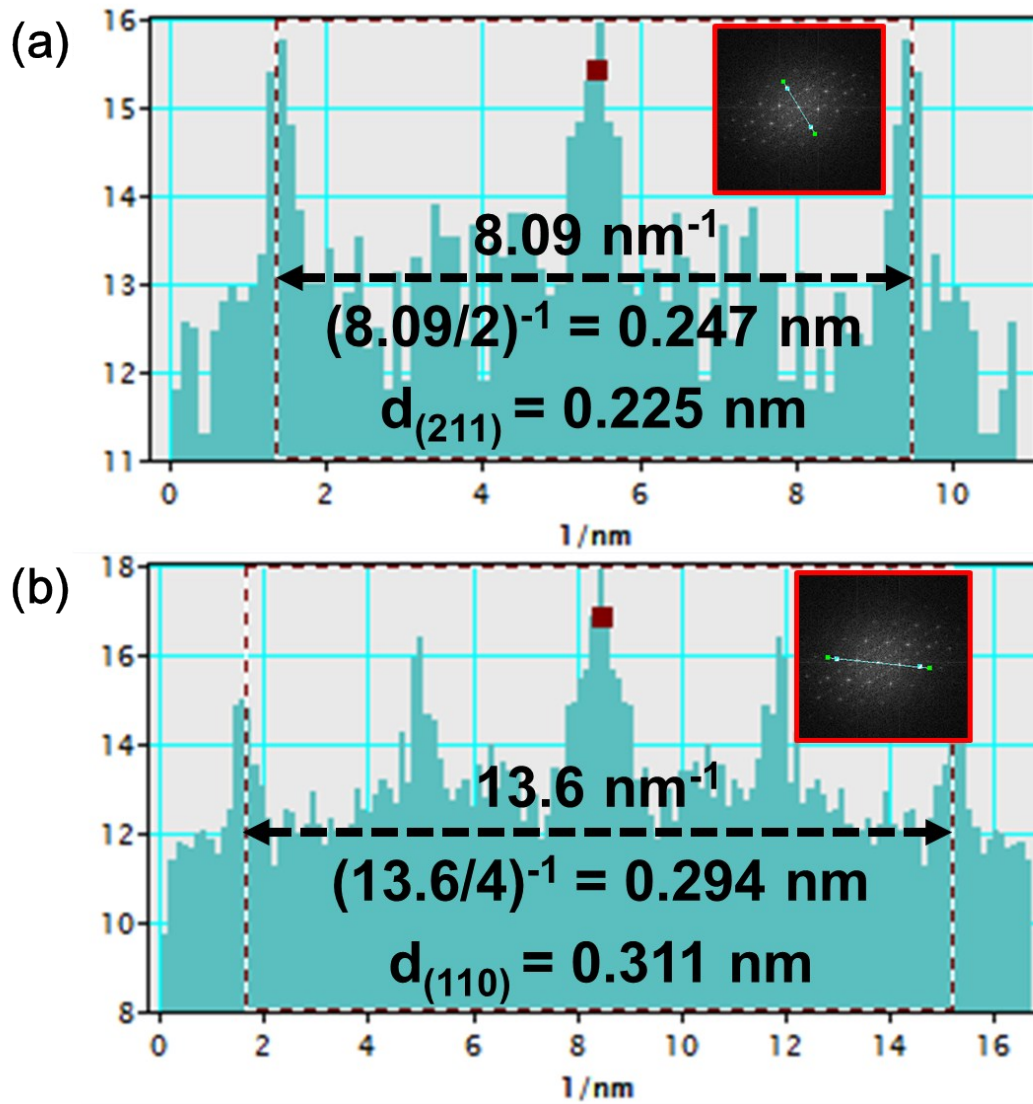

**Fig. S1** (a) The distance between (211) reciprocal points of multilayer antimonene, (b) The distance between (110) reciprocal points of multilayer antimonene.

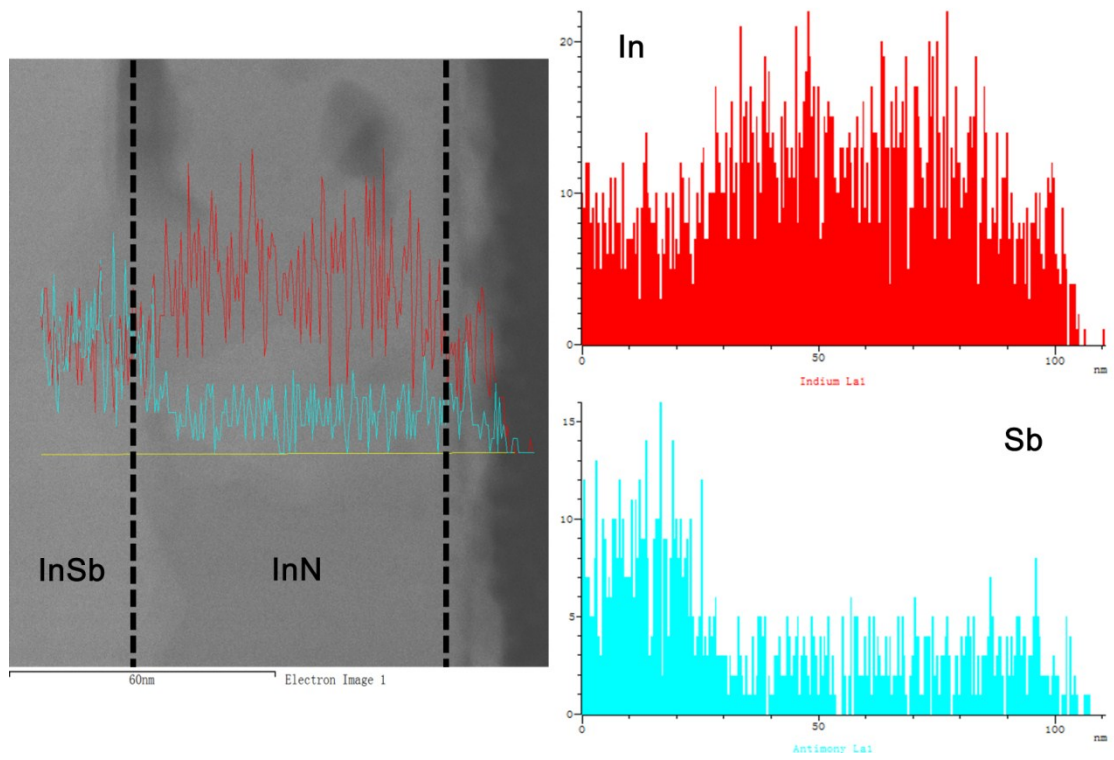

**Fig. S2** Energy dispersive spectrum (EDS) of the multilayer antimonene/InN/InSb.
